# Supplementary material for: The key role of NLRP3 and STING in APOL1-associated podocytopathy
Source: JCI journal article supplement (doi:10.1172/jci136329), 2021-10-14
Supplement: sd1 [file 1]

Fig S1

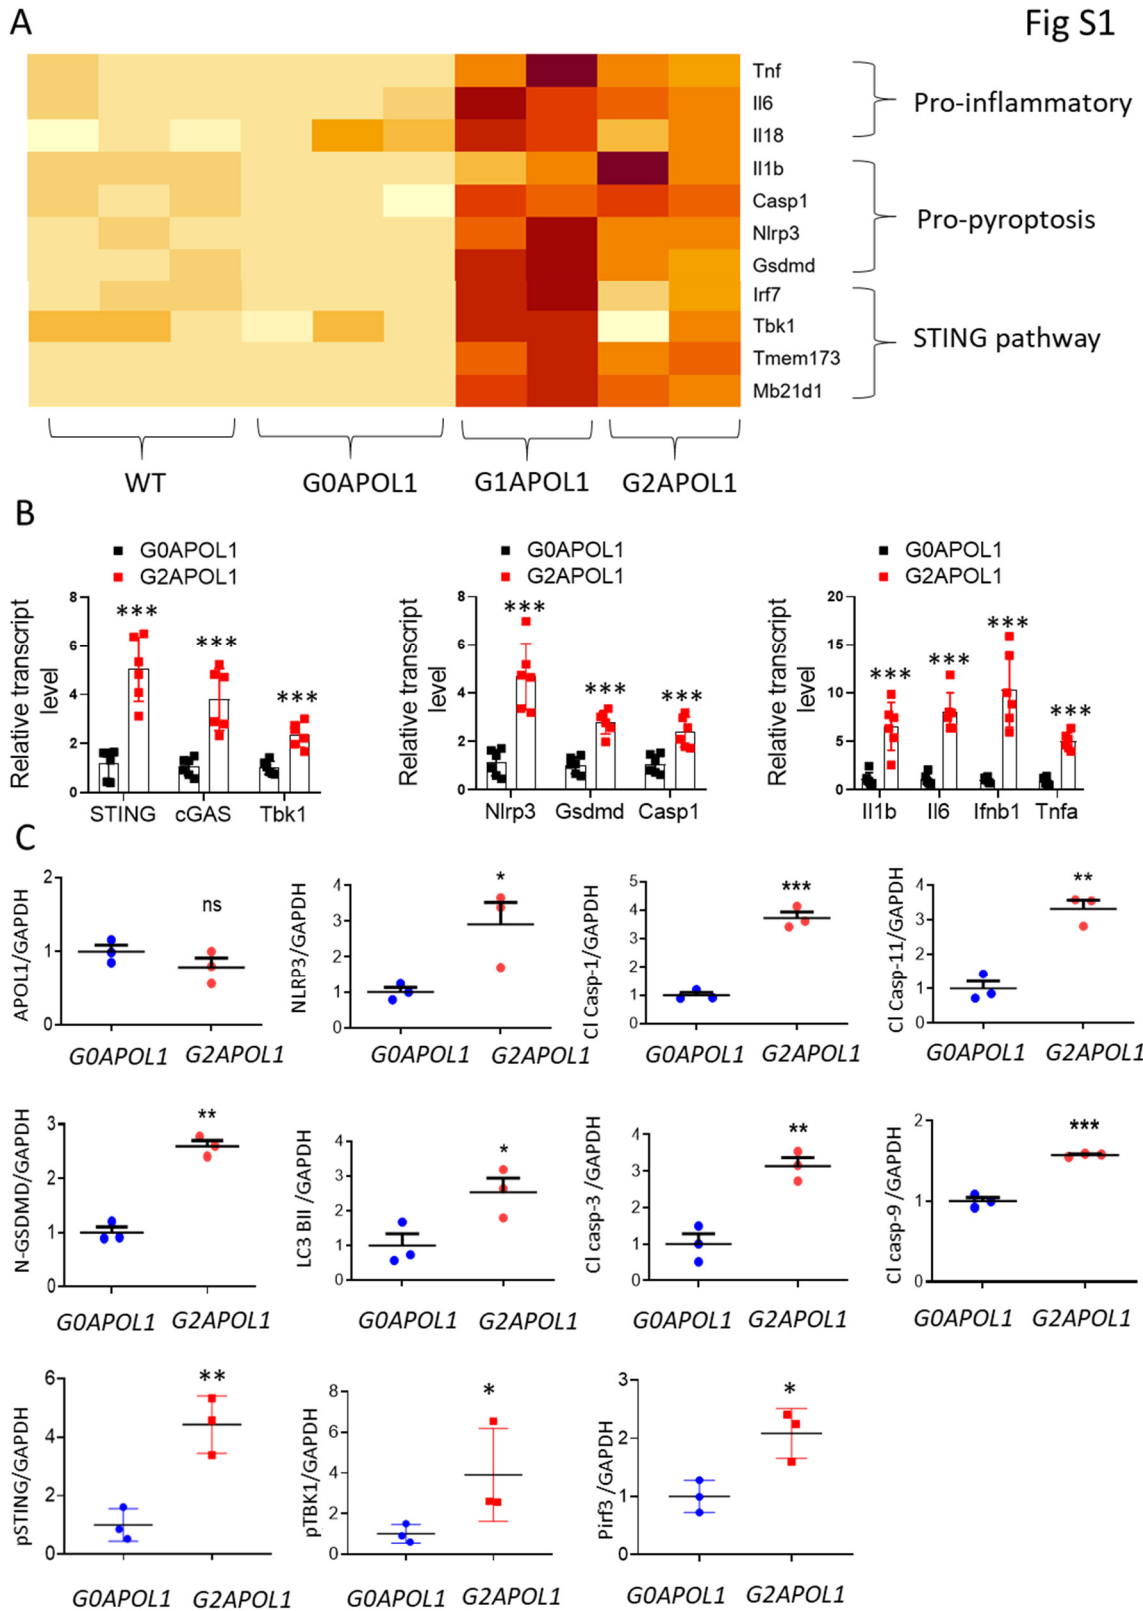

**Supplemental Fig.1. Podocyte specific APOL1 risk allele expression activates cell death pathways in mice kidneys.**

- A. Heatmap of RNA-seq based gene expression in kidneys of wild type, *Nphs1-rtTA/TRE-APOL1-G0/G1/G2* mice
- B. Relative transcript level of *STING*, *cGAS*, *Tbk1*, *Nlrp3*, *Gsdmd*, *Casp1*, *Il1b*, *Il6*, *Ifnb1* and *Tnfa* in *G20POL1* and *G2APOL1* mice analyzed by QRT-PCR. \*\*\* $p < 0.001$  vs *GOAPOL1*.
- C. Densitometric quantification of the expression of APOL1, NLRP3, Cleaved caspase-1 and LC3-II, Cleaved caspase-3 and Cleaved caspase-9, p-STING and p-TBK1, normalized to GAPDH between *Nphs1-rtTA/TREGOAPOL1-GFP* (*GOAPOL1*) and *Nphs1-rtTA/TREG2APOL1-GFP* (*G2APOL1*) mice. N = 3; \* $p < 0.05$ , \*\* $p < 0.01$ , and \*\*\* $p < 0.001$  vs *GOAPOL1*.

Fig S2

A

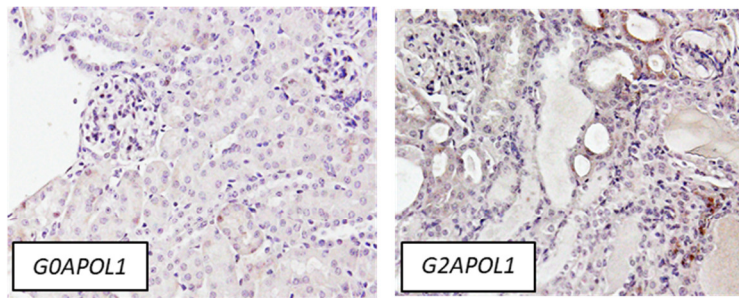

B

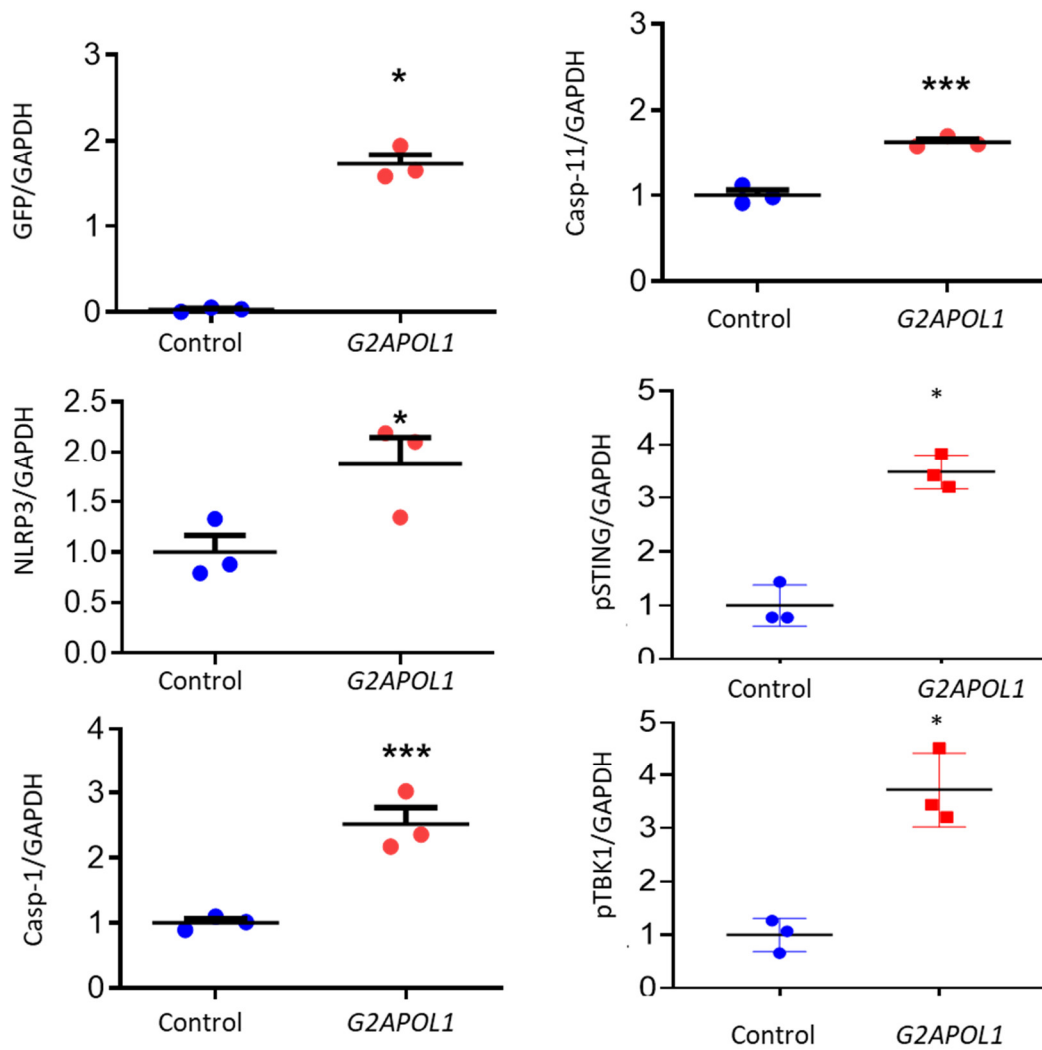

**Supplemental Fig.2. Inflammasome activation in kidneys of podocyte specific APOL1 risk allele mice**

A. Immunostaining of cleaved caspase-3 in *GOAPOL1* and *G2APOL1* mice. Brown staining indicates cleaved caspase-3 expression. Scale bar =10 $\mu$ m.

B. Densitometric quantification of the expression of GFP (proxi for APOL1), NLRP3, Cleaved caspase-1, and Cleaved caspase-11, p-STING and p-TBK1, normalized to GAPDH in the glomeruli of Control and *G2APOL1* mice given doxycycline diet for 3 days to induce APOL1 expression. N = 3; \*p <0.05, and \*\*\*p<0.001 vs Control.

Fig S3

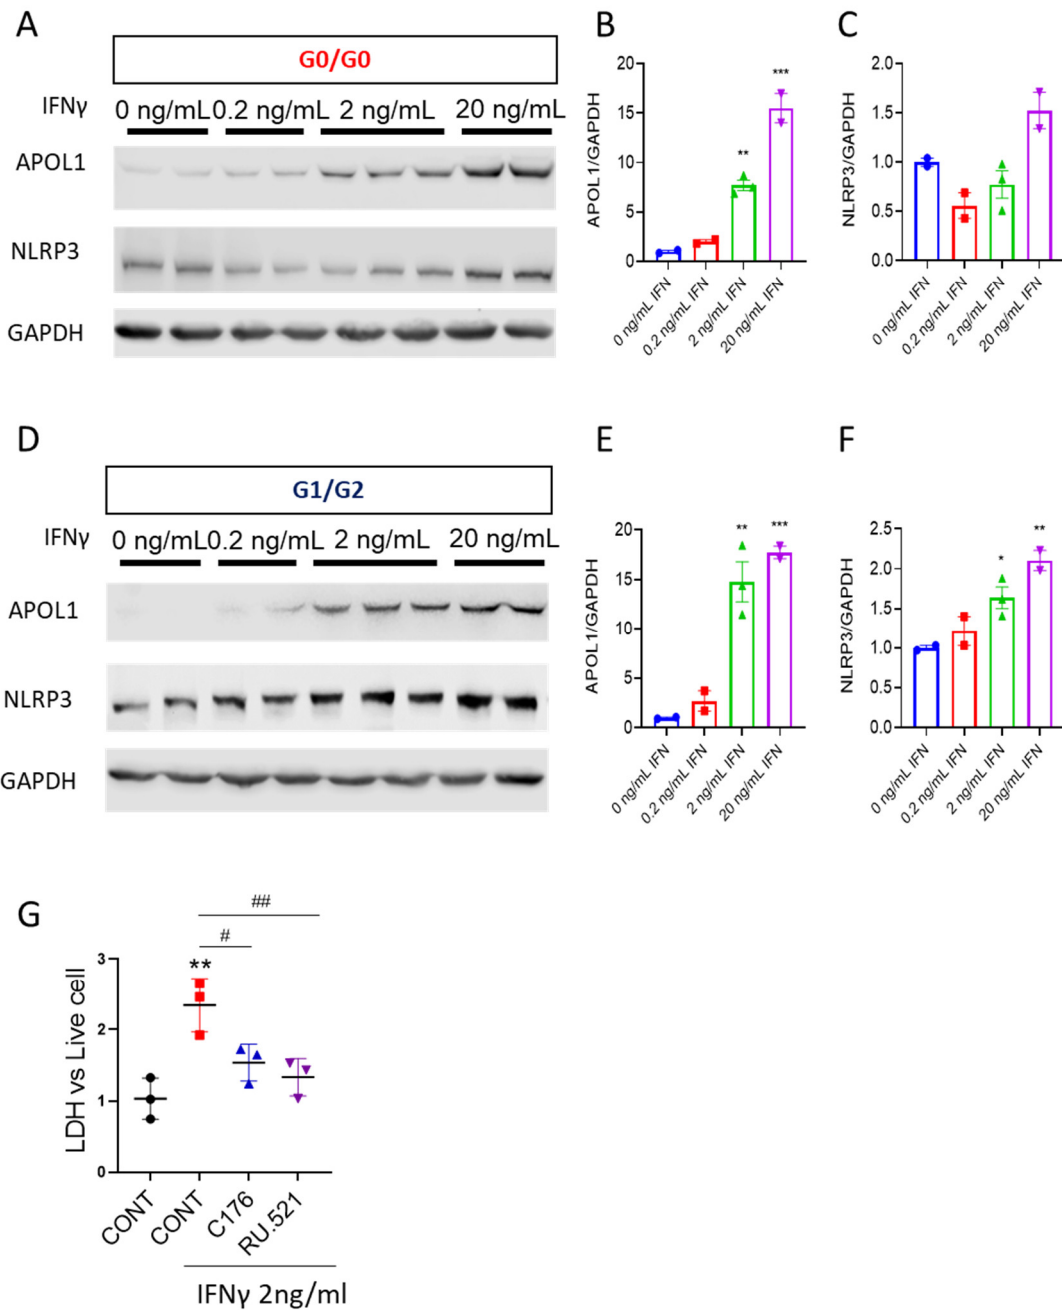

**Supplemental.Fig.3. *APOL1*-induced cytotoxicity in high-risk human podocytes is inflammasome and STING dependent.**

- A. Representative western blots of *APOL1*, *NLRP3*, and *GAPDH* from G0/G0 and G1/G2 HUPEC cells treated with vehicle (0ng/ml IFN  $\gamma$  ), or 0.2ng/ml, 2ng/ml, and 20 ng/ml IFN  $\gamma$  for 24h.
- B. Densitometric quantification of *APOL1* normalized to *GAPDH* in G0/G0 HUPEC cells. N = 2-3 independent experiments. \* $p < 0.05$ , \*\*\* $p < 0.001$  vs G0/G0.
- C. Densitometric quantification of *NLRP3* normalized to *GAPDH* in G0/G0 HUPEC cells. N = 2-3 independent experiments.
- D. Representative western blots of *APOL1*, *NLRP3*, and *GAPDH* from high-risk G1/G2 HUPEC cells treated with 0ng/ml, 0.2ng/ml, 2ng/ml, and 20 ng/ml IFN  $\gamma$  for 24h.
- E. Densitometric quantification of *APOL1* normalized to *GAPDH* in G1/G2 HUPEC cells. N = 2-3 independent experiments. \*\* $p < 0.01$ , \*\*\* $p < 0.001$  vs G0/G0.
- F. Densitometric quantification of *NLRP3* normalized to *GAPDH* in G1/G2 HUPEC cells. N = 2-3 independent experiments. \* $p < 0.05$ , \*\* $p < 0.01$  vs G1/G2.
- G. Cell cytotoxicity in G1/G2 HUPEC cells. G1/G2 HUPEC cells were treated with 2ng/ml IFN  $\gamma$  for 24 hours in the presence inhibitors of STING: C176 or cGAS: RU.521. \*\* $p < 0.01$  vs Control. And # $p < 0.05$ , ## $p < 0.01$  vs indicated group.

Fig S4

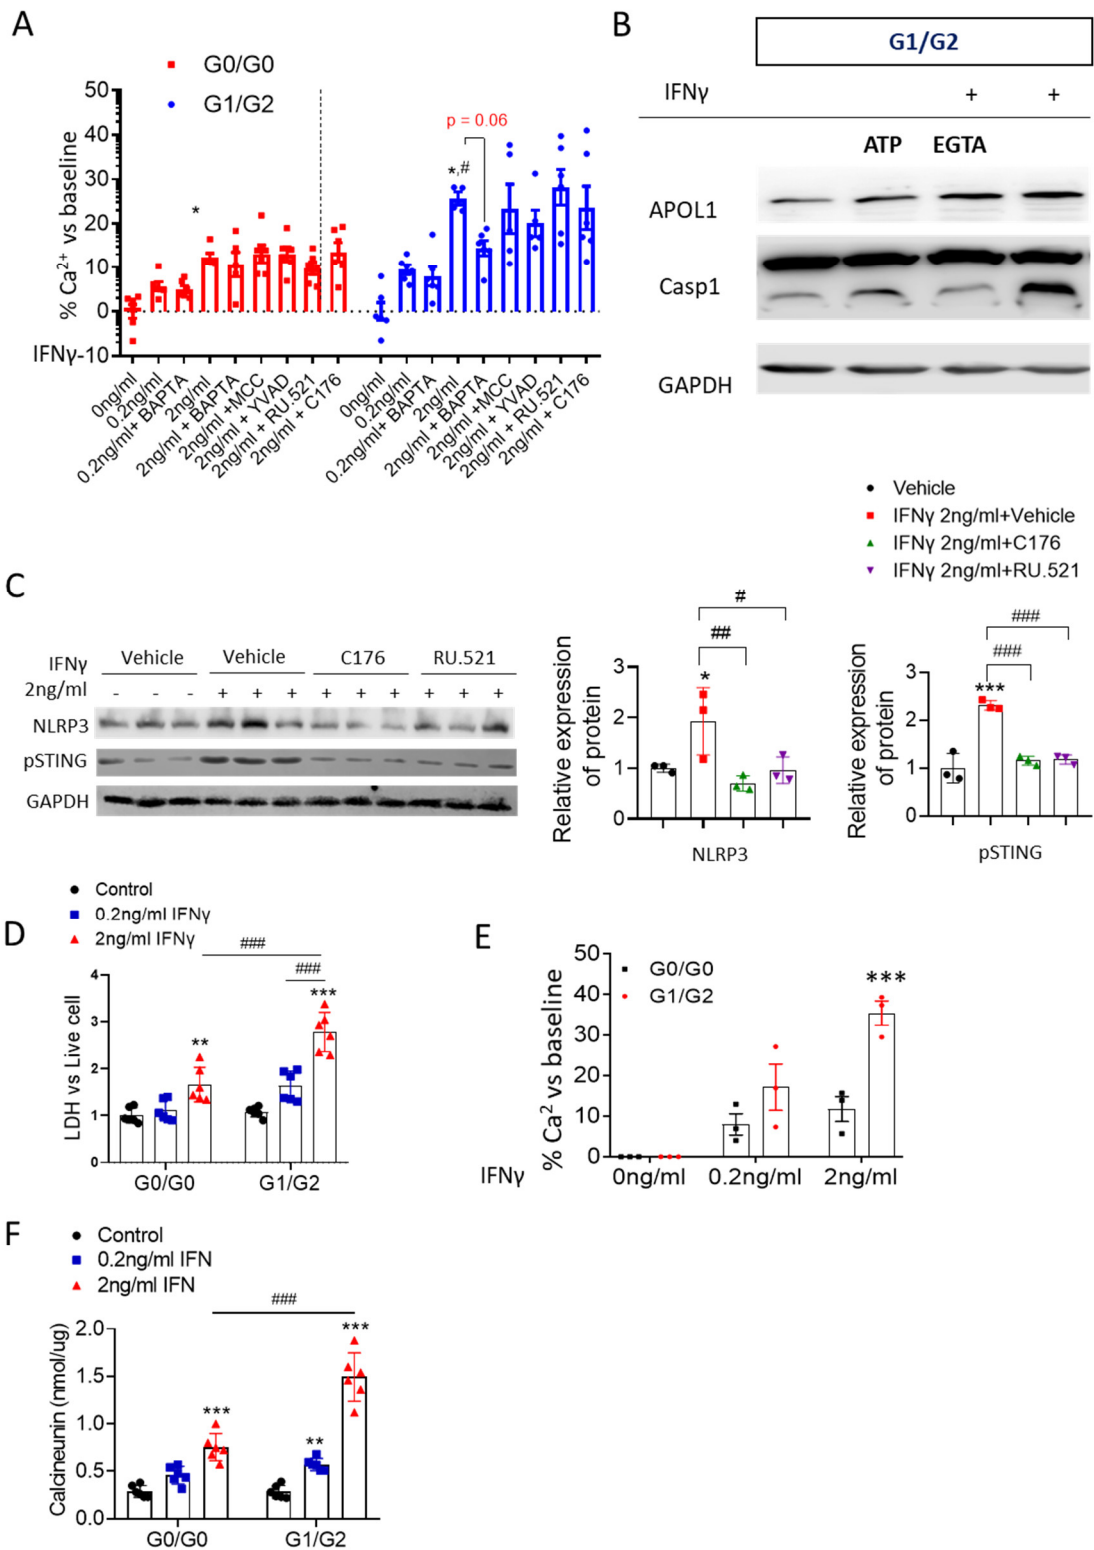

**Supplemental.Fig.4. High risk APOL1-induced cytotoxicity is ameliorated by pyroptosis inhibition or calcium chelation.**

- A. Intracellular  $\text{Ca}^{2+}$  was measured in G0/G0 and G1/G2 cells using FURA-2 AM calcium indicator. Cells were treated with 0.2 ng/ml IFN  $\gamma$   $\pm$  BAPTA, 2ng/ml IFN  $\gamma$   $\pm$  BAPTA for 8h. Baseline  $\text{Ca}^{2+}$  release of G0/G0 and G1/G2 were normalized and set to zero. \*\*\* $p < 0.001$  vs respective control treated cells; ## $p < 0.01$  vs control treated G0/G0 cells. Red \*\* $p < 0.01$  vs 2ng/ml  $\pm$  BAPTA treatment. Representative experiment out of 3 independents. Each experiment was done in 6 replicates.
- B. Immunoblot analysis of G1/G2 podocytes treated with ATP as a positive control for inflammasome activation and 2ng/ml IFN  $\gamma$   $\pm$  calcium chelator (EGTA). A representative experiment out of three experiments is presented here.
- C. Immunoblot analysis of G1/G2 podocytes treated with Vehicle, C176 or RU.521. (Right panel) densitometric quantification of NLRP3 and phosphorylation STING normalized to GAPDH. N = 3 independent experiments; \* $p < 0.05$ , \*\*\* $p < 0.001$  vs G0/G0 and # $p < 0.05$ , ## $p < 0.01$ , and ### $p < 0.001$  vs indicated group.
- D. Cytotoxicity measured by LDH release was normalized to calcein absorbance as an indicator of live cell count of untreated G0/G0 and G1/G2 cells, respectively. G0/G0 and G1/G2 cells were treated for 24h with 0.2 ng/ml, 2ng/ml and 20ng/ml IFN  $\gamma$  . Representative experiment out of 3 experiments. \*\*\*  $p < 0.001$  vs 0ng/ml IFN  $\gamma$  treated G1/G2 cells.
- E. Change in intracellular  $\text{Ca}^{2+}$  measured by FURA-2 AM (calcium indicator) as a percentage of baseline calcium (set to zero). Cells were treated with 0.2 ng/ml, 2ng/ml, and 20 ng/ml IFN  $\gamma$  for 8hours. N = 3; \* $p < 0.05$  vs control-treated cells.
- F. G0/G0 and G1/G2 HUPEC were treated with the indicated concentrations of IFN  $\gamma$  or left untreated. Calcineurin activity was analysed using a calcineurin-activity assay. \*\* $p < 0.05$ , \*\*\* $p < 0.001$  vs. Control; ### $p < 0.001$  vs. indicated group.



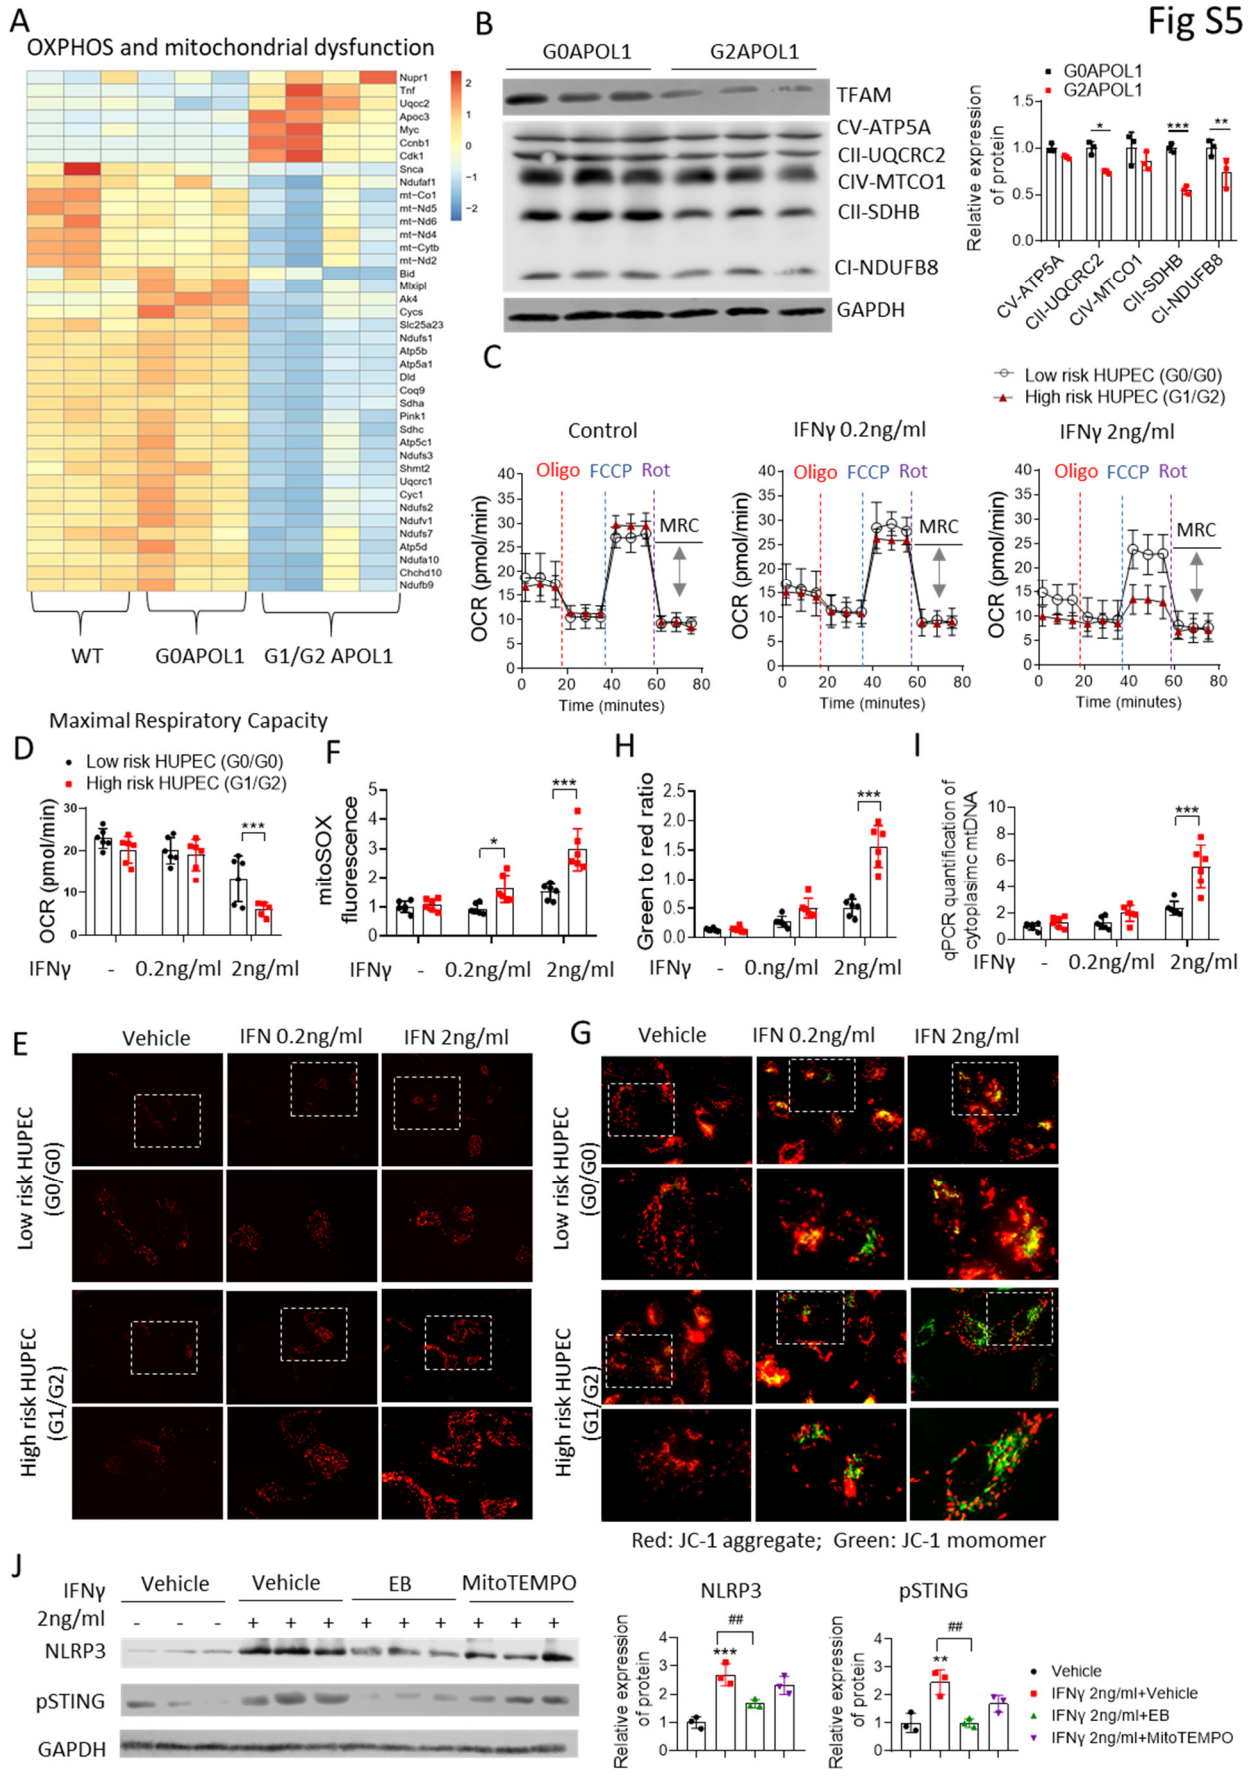

**Supplemental Figure 5. APOL1 risk allele induced defect in mitochondrial function.**

- A. Heatmap of expression OXPHOS genes analysed by RNA-seq in kidneys of wild type *Nphs1-rtTA/TRE-APOL1-G0/G1/G2* mice
- B. Western blots of whole kidney lysates from *G0APOL1* and *G2APOL1* mice, showing levels of TFAM, OXPHOS proteins (CV-ATP5A, CII-UQCRC2, CIV-MTCO1, CII-SDHB and CI-NDUFB8), and GAPDH. (Right panel) densitometric quantification of TFAM and OXPHOS proteins normalized to GAPDH. N = 3 treatments; \*p<0.05, \*\*p<0.01, and \*\*\*p<0.001 vs *G2APOL1* mice.
- C. Real-time changes in the oxygen consumption ratio (OCR) of HUPEC after treatment with oligomycin (Oligo), FCCP, and rotenone (Rot). MRC, maximal respiratory capacity (double-headed arrow).
- D. Maximal respiratory capacity of HUPEC measured by real-time changes in OCR. \*\*\*p<0.001 vs G1/G2 APOL1 HUPEC.
- E. mtROS levels measured by MitoSOX staining in G0/G0 APOL1 and G1/G2 APOL1 HUPEC treated with vehicle, 0.2ng/ml IFN  $\gamma$  or 0.2ng/ml IFN  $\gamma$  . Representative images are shown. Scale bar=10  $\mu$  m.
- F. Quantification of the mtROS in the experiment shown in panel E. \*\*\*p<0.001 vs *Vehicle*.
- G. Mitochondrial membrane potential ( $\Delta \psi$  m) was determined by the JC-1 assay in G0/G0 APOL1 and G1/G2 APOL1 HUPEC treated with vehicle, 0.2ng/ml IFN  $\gamma$  or 0.2ng/ml IFN  $\gamma$  . Scale bar = 10  $\mu$  m.
- H. Quantification of the JC-1 fluorescence ratio in the experiment shown in panel G. \*\*\*p<0.001 vs *Vehicle*.
- I. Cytosolic mtDNA genes were normalized to respective nuclear RPL13A and presented as fold enrichment over media-treated controls. \*\*\*p<0.001 vs indicated group.
- J. Immunoblot analysis of G1/G2 podocytes treated with Vehicle, ethidium bromide (EB) (72h, 150ng/ml), or MitoTEMPO (100nM, 4h). (Right panel) densitometric quantification of NLRP3 and phosphorylation STING normalized to GAPDH. N = 3 treatments; \*\*p<0.01, \*\*\*p<0.001 vs G0/G0 and ##p<0.01 vs indicated group.

Fig S6

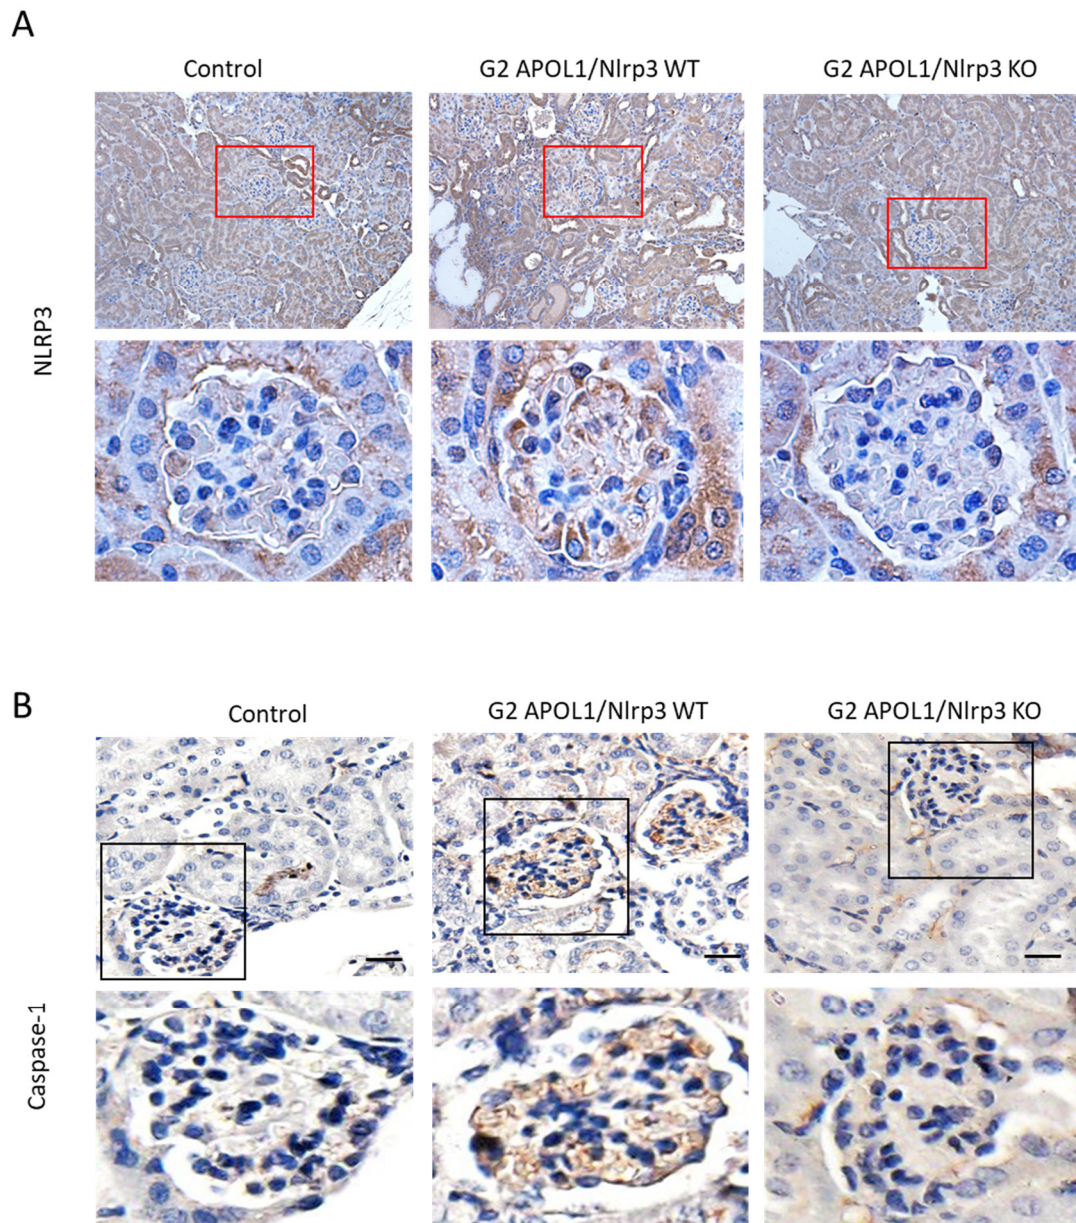

**Supplemental Fig.6. Expression of NLRP3 and Caspase1 in kidneys of podocyte specific APOL1 risk allele mice.**

Immunohistochemical analysis of NLRP3 (A) and Cleaved Caspase-1(B) staining in Nphs1-rtTA (Control), Nphs1rtTA/TREG2APOL1 (G2APOL1/Nlrp3 WT), and Nphs1rtTA/TREG2APOL1/ Nlpr3<sup>-/-</sup> (G2APOL1/Nlrp3 KO) mice. Brown staining indicates cleaved NLRP3 expression. Scale bar =10  $\mu$ M.

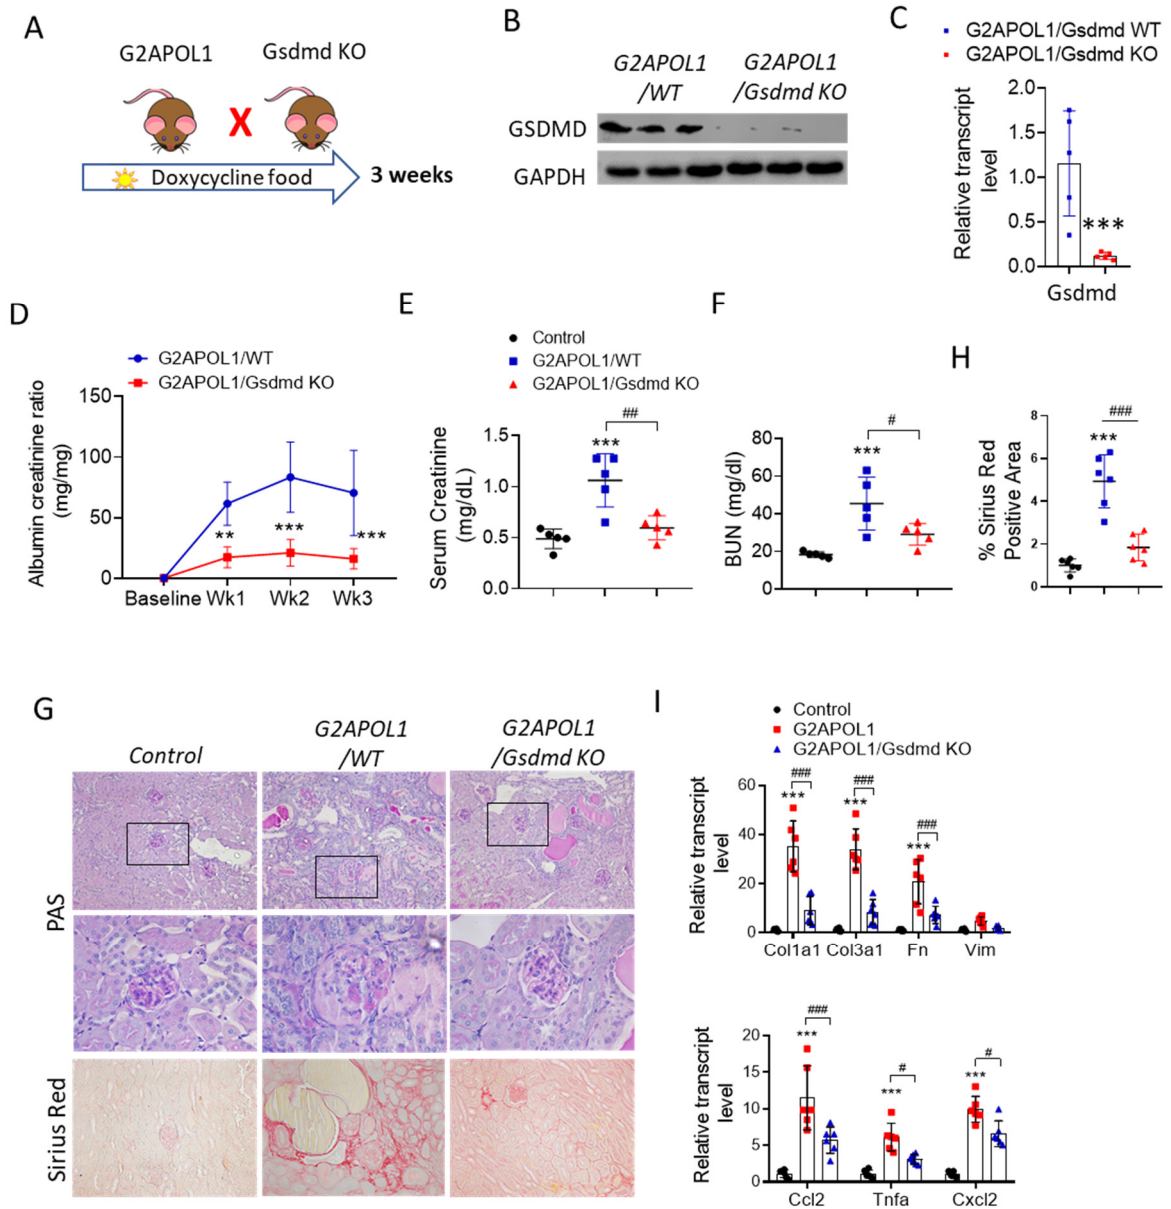

**Supplemental Fig.7. Genetic deletion of *Gsdmd* in *G2APOL1* transgenic mice markedly improves kidney function.**

- A. Experimental design for the generation of *Nphs1rtTA/TREG2APOL1/Gsdmd KO* (*G2APOL1/Gsdmd KO*) mice.
- B. Western blots of whole kidney lysates from *G2APOL1/Gsdmd WT* and *G2APOL1/Gsdmd KO* mice, showing levels *Gsdmd* and GAPDH.
- C. Relative *Gsdmd* transcript level in kidney of *G2APOL1/Gsdmd WT* and *G2APOL1/Gsdmd KO* mice. \*\*\* $p < 0.01$  vs *G2APOL1/Gsdmd WT*.

- D. ACR of *G2APOL1/Gsdmd WT* (N = 5) and *G2APOL1/Gsdmd KO* mice (N = 5) at baseline, 1, 2 and 3 weeks on doxycycline diet. \*\*p<0.01, \*\*\*p<0.001, compares *G2APOL1/Gsdmd WT* mice at the same time points.
- E. Serum creatinine levels in control, *G2APOL1/Gsdmd WT* and *G2APOL1/Gsdmd KO* mice. \*\*\*p<0.001 vs. Control; ##p<0.01 vs. indicated group.
- F. Serum urea nitrogen (BUN) levels in control, *G2APOL1/Gsdmd WT* and *G2APOL1/Gsdmd KO* mice. \*\*\*p<0.001 vs. Control; #p<0.05 vs. indicated group.
- G. PAS-stained and Sirius red-stained kidney sections of control, *G2APOL1/Gsdmd WT*, and *G2APOL1/Gsdmd KO* mice. Scale bar =10µm.
- H. Quantification of Sirius red-positive area of control, *G2APOL1/Gsdmd WT* and *G2APOL1/Gsdmd KO* mice. N = 6 mice per group. \*\*\*p<0.001 vs. Control; ###p<0.001 vs. indicated group.
- I. Relative mRNA levels markers of fibrosis; *Col1a1*, *Col3a1*, *Fn1*, and *Vim*, and markers of inflammation; *Ccl2*, *Tnfa*, *Cxcl2* were evaluated in the kidneys of control, *G2APOL1/Gsdmd WT* and *G2APOL1/Gsdmd KO* mice. N = 6 mice. \*\*\*p<0.001 vs. Control; #p<0.0 ###p<0.001 vs. indicated group.

A

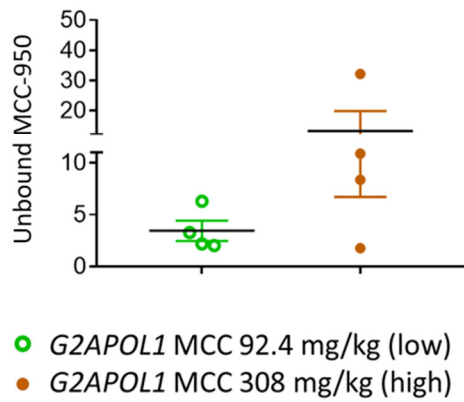

B

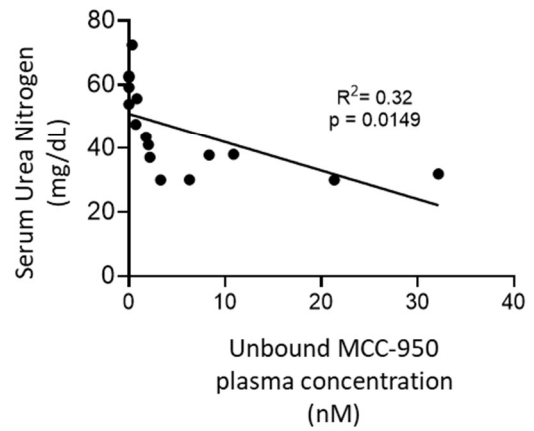

**Supplemental Fig. 8. Plasma concentration of MCC-950 correlates with renal function of *G2APOL1* mice.**

- (A) Plasma concentration of unbound MCC-950 in was estimated by liquid chromatography coupled to tandem mass spectrometry (LC-MS/MS) in *NPHS1-rtTA/TREG2APOL1* (*G2APOL1*) mice treated with *G2APOL1* MCC 92.4 mg/kg (N =4) , *G2APOL1* MCC 308 mg/kg (N= 4).
- (B) Serum urea nitrogen plotted against unbound MCC-950 plasma concentration to determine if NLRP3 inhibitor concentration correlated with renal function.

Fig S9

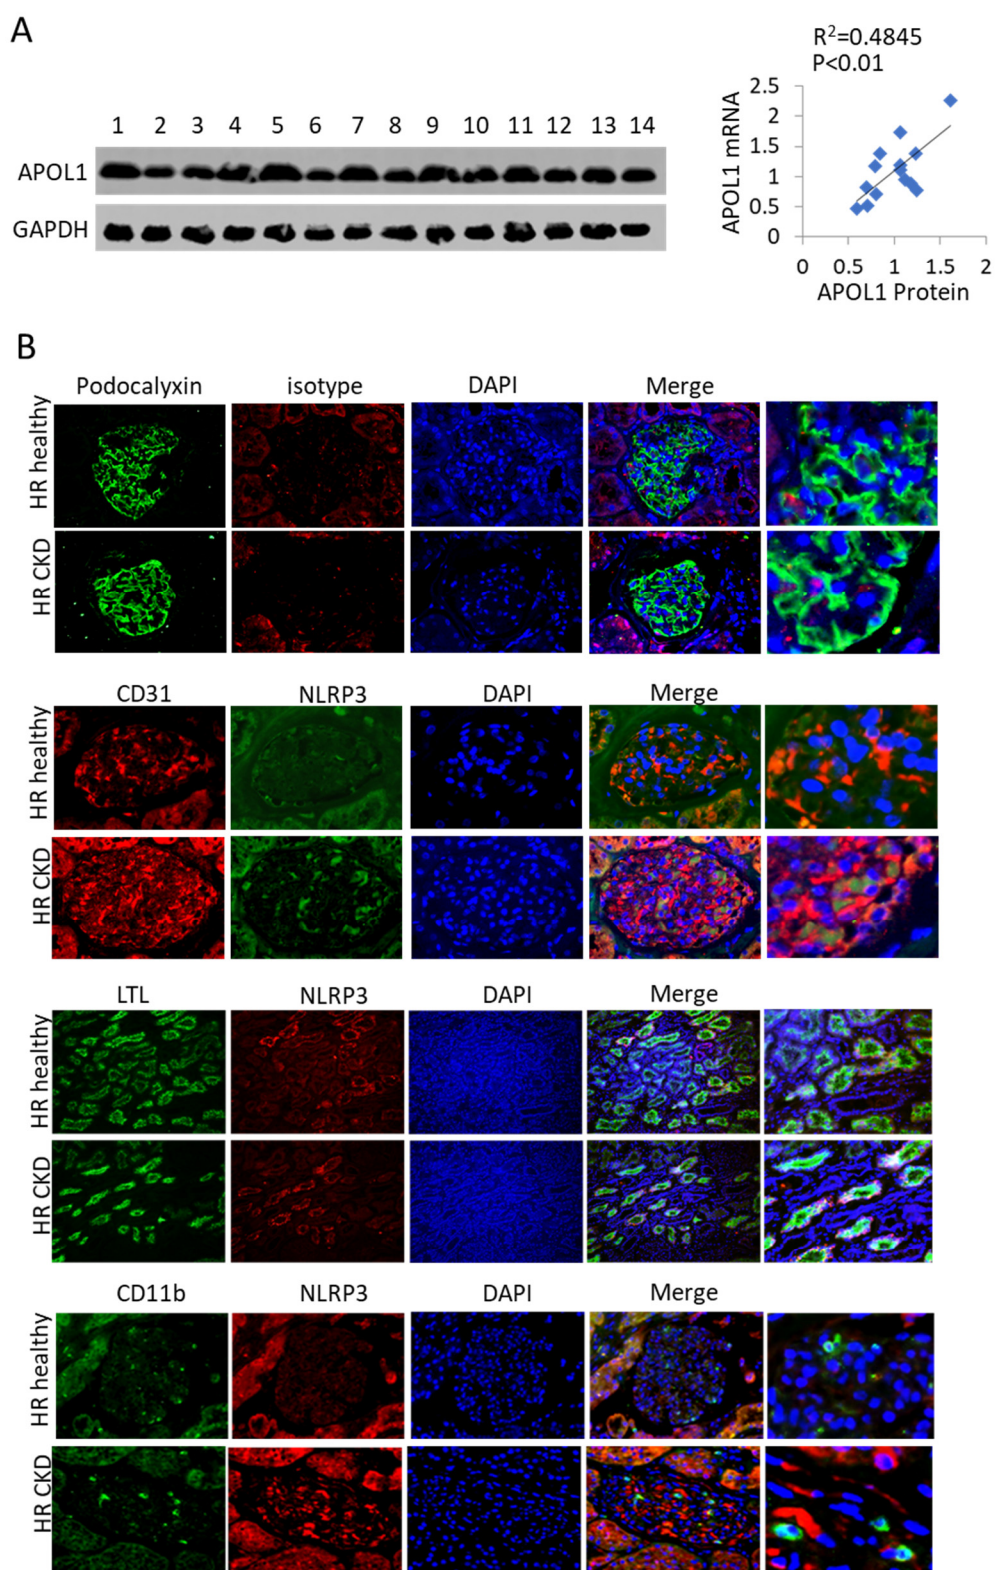

**Supplemental Fig. 9. Increase in podocyte NLRP3 and inflammasome expression in APOL1 high-risk patients**

- A. Western blots of whole kidney lysates from 14 individual kidney samples, showing levels APOL1 and GAPDH. (Right panel) The correlation of transcript level of APOL1 and protein level of APOL1 (Pearson correlation).
- B. Representative immunofluorescence co-staining of NLRP3 isotype with Podocalyxin, or CD31, LTL, CD11B and DAPI in kidney samples of APOL1 high-risk control and CKD patients. Scale bar = 10 $\mu$ m.



**Table 1:**

| Primary Cohort                                               |                 |
|--------------------------------------------------------------|-----------------|
| Subjects (n)                                                 | N=427           |
| GFR (ml/min/1.73 m <sup>2</sup> by CKD-EPI)                  | 69.76 (24.92 %) |
| Gender (%Female)                                             | 155 (36.3 %)    |
| Age                                                          | 61.18 (12.56 %) |
| Race                                                         |                 |
| Asian (n)                                                    | 6 (1.41 %)      |
| Caucasian (n)                                                | 312 (73.07 %)   |
| African American (n)                                         | 1 (0.23 %)      |
| Hispanic (n)                                                 | 64 (14.99 %)    |
| Multi-racial (n)                                             | 10 (2.34 %)     |
| Diabetes                                                     | 166 (38.88 %)   |
| Hypertension                                                 | 301 (70.49 %)   |
| Dipstick Protein (0=neg, 1=trace, 2=30, 3=100, 4=300, 5>300) | 1.02 (1.51)     |
| BMI (kg/m <sup>2</sup> )                                     | 31.09 (8.01)    |
| HgbA1c                                                       | 6.8 (1.52)      |
| Serum glucose (mg/dl)                                        | 131.98 (62.62)  |
| BP systolic (mmHg)                                           | 136.94 (20.84)  |
| Serum-alb (g/dl)                                             | 4.04 (1.06)     |
| Glomeruli: Hypoperfused: 0-3                                 | 0.84 (0.68)     |
| Glomeruli: Wall Thickening: 0-3                              | 0.18 (0.5)      |
| Glomeruli: Mesangial Matrix: 0-3                             | 0.41 (0.76)     |
| Glomeruli: Mesangial Cellularity: 0-3                        | 0.33 (0.7)      |
| Glomeruli: KW Nodules: 0-1                                   | 0.03 (0.17)     |
| Glomeruli: Pericapsular Fibrosis: 0-2                        | 0.71 (0.67)     |
| Glomeruli: Globally Schlerotic %                             | 11.81 (15.43)   |
| Tubules: % Atrophy                                           | 10.72 (16.77)   |
| Tubules: % Acute Tubular Injury                              | 2.83 (6.32)     |
| Tubules: Reabsorption: 0-3                                   | 0.37 (0.6)      |
| Interstitialium: % Fibrosis                                  | 11 (16.12)      |
| Interstitialium: Lymphocytic Infiltrate: 0-3                 | 1.04 (0.85)     |
| Interstitialium: Plasmacytic Infiltrate: 0-3                 | 0.38 (0.62)     |
| Interstitialium: Eosinophils: 0-3                            | 0.26 (0.5)      |
| Vessels: Medial Thickening: 0-3                              | 0.11 (0.37)     |
| Vessels: Intimal Fibrosis: 0-3                               | 1.44 (0.81)     |
| Vessels: Arteriolar Hyalinosis: 0-3                          | 0.51 (0.74)     |

**Table 2: Primers**

| Primers     | Forward                          | Reverse                          |
|-------------|----------------------------------|----------------------------------|
| ASC         | CAGAGTACAGCCAGAACAGGACAC         | GTGGTCTCTGCACGAACTGCCTG          |
| Casp1       | CGTGGAGAGAAACAAGGAGTG            | AATGAAAAGTGAGCCCCTGAC            |
| Casp11      | TCACTGAGGTATGGGGCTAA             | TGACTTTGGGTTTGTCTCGTA            |
| Col1a1      | GCTCTTTTGTAGATACTGTGGTGAGG<br>AA | GTTCCACGTCTCACCATTG              |
| Col3a1      | ACAGCTGGTGAACCTGGAAG             | ACCAGGAGATCCATCTCGAC             |
| Ccl2        | CCCAATGAGTAGGCTGGAGA             | AAAATGGATCCACACCTTGC             |
| Cxcl2       | GAGCTTGAGTGTGACGCCCCAGG          | GTTAGCCTTGCCTTTGTTCAGTATC        |
| FN          | ATGTGGACCCCTCTGATAGT             | GCCCAGTGATTCAGCAAAGG             |
| Gapdh       | AGGTCATCCCAGAGCTGAACG            | AGGTCATCCCAGAGCTGAACG            |
| HPRT        | CACAGGACTAGAACACCTGC             | GCTGGTGAAAAGGACCTCT              |
| IL1b        | CCCTGCAGCTGGAGAGTGTGGA           | TGTGCTCTGCTTGTGAGGTGCTG          |
| IL6         | CCTCTCTGCAAGAGACTTCCAT           | AGTCTCCTCTCCGGACTTGT             |
| Nlrp3       | GGTCCTCTTACCATGTGCTTC            | AAGTCATGTGGCTGAAGCTGTA           |
| Ubiquitin C | GCCCAGTGTTACCACCAAGAAG           | GCTCTTTTGTAGATACTGTGGTGAG<br>GAA |
| Vim         | GGAGGCCACGAACTTCACTCT            | GGGATGCAACACCTATTGTCAGT          |
| Ifit1       | CTGAGATGTCACTTCACATGGAA          | GTGCATCCCCAATGGGTTCT             |
| Ifitm1      | GACAGCCACCACAATCAACAT            | CCCAGGCAGCAGAAGTTCAT             |
| Mx2         | CTTGCGCCTCTGATTGCTTTG            | GTTGCCATCTTCGCGTTGC              |
| Isg15       | GGTGTCCGTGACTAACTCCAT            | TGGAAAGGGTAAGACCGTCCT            |
| Stat1       | TCACAGTGGTTTCGAGCTTCAG           | GCAAACGAGACATCATAGGCA            |
